# Supplementary material for: Oral drug suitability parameters
Source: Medchemcomm. 2018 Feb 5;9(3):460–70. doi: 10.1039/c7md00586e (PMC6072407; doi:10.1039/c7md00586e)
Supplement: Supplementary file 2 [file MD-009-C7MD00586E-s002.xlsx]

## Sheet: Summary
Drug	Charge type	pKa	Solubility7.4 (M)	Caco2 A2B pH6.5 (cm s-1 )	Vss (L kg-1)	Cl (mL min-1 kg-1)	PPB (% bound)
chlorpromazine	monobase	9.24	0.000372	2e-05	10	16	98.64
diazepam	neutral		0.000157	6.03e-05	1	0.38	98.61
diclofenac	monoacid	4.26	0.00653	5.37e-05	0.19	3.83	99.68
furosemide	monoacid	3.94	0.178	2.82e-07	0.11	2.19	98.37
haloperidol	monobase	8.63	7.56e-05	1.58e-05	17	7.8	85.48
imipramine	monobase	9.5	0.00985	2.75e-05	12	13	87.87
indomethacin	monoacid	4.31	0.00144	2.95e-05	0.16	1.61
ketoprofen	monoacid	4.25	0.555	4.68e-05	0.13	1.6	98.73
naproxen	monoacid	4.23	0.0987	4.68e-05	0.09	0.07
nifedipine	neutral		5.23e-05	3.24e-05	0.79	7.3	96.17
phenytoin	monoacid	8.06	8.51e-05	3.98e-05	1.4	0.57	87.11
pindolol	monobase	9.54	0.0262	3.89e-05	1.2	7.7
prazosin	monobase	6.5	1.48e-05	4.07e-06	0.73	4.7	96
trimethoprim	monobase	7.26	0.00217	8.71e-05	1.5	2.1	66.1
warfarin	monoacid	4.97	0.00335	4.37e-05	0.12	0.05	99.31

## Sheet: Raw pKa
Number	Journal	Drug	Parameter	Value	pKa	Charge type		Drug	Charge type	pKa
1	(2006) J. Pharm. Sci., 95, 1298-1307	chlorpromazine	pKa	9.24	9.24	monobase		chlorpromazine	monobase	9.24
2	(2008) Eur. J. Pharm. Sci., 33, 230-240	chlorpromazine	pKa	9.24				diazepam	neutral
3		diazepam	pKa			neutral		diclofenac	monoacid	4.26
4	(2007) Adv. Drug Deliver. Rev., 59, 568-590	diclofenac	pKa	4.14	4.2575	monoacid		furosemide	monoacid	3.94
5	(2008) Eur. J. Pharm. Sci., 33, 230-240	diclofenac	pKa	3.99				haloperidol	monobase	8.63
6	(2009) Eur. J. Med. Chem., 44, 4455-4460	diclofenac	pKa	4.8				imipramine	monobase	9.5
7	(2011) J. Assoc. Lab. Autom., 16, 276-284	diclofenac	pKa	4.1				indomethacin	monoacid	4.31
8	(2006) J. Pharm. Sci., 95, 1298-1307	furosemide	pKa	3.6	3.93667	monoacid		ketoprofen	monoacid	4.25
9	(2009) Eur. J. Med. Chem., 44, 4455-4460	furosemide	pKa	4.7				naproxen	monoacid	4.23
10	(2010) J. Med. Chem., 53, 3566-3584	furosemide	pKa	3.51				nifedipine	neutral
11	(2009) Eur. J. Med. Chem., 44, 4455-4460	haloperidol	pKa	8.65	8.625	monobase		phenytoin	monoacid	8.06
12	(2011) J. Assoc. Lab. Autom., 16, 276-284	haloperidol	pKa	8.6				pindolol	monobase	9.54
13	(2006) J. Pharm. Sci., 95, 1298-1307	imipramine	pKa	9.54	9.495	monobase		prazosin	monobase	6.5
14	(2009) Eur. J. Med. Chem., 44, 4455-4460	imipramine	pKa	9.45				trimethoprim	monobase	7.26
15	(2007) J. Med. Chem., 50, 5858-5862	indomethacin	pKa	4	4.30667	monoacid		warfarin	monoacid	4.97
16	(2008) Eur. J. Pharm. Sci., 33, 230-240	indomethacin	pKa	4.42
17	(2009) Eur. J. Med. Chem., 44, 4455-4460	indomethacin	pKa	4.5
18	(2007) Adv. Drug Deliver. Rev., 59, 568-590	ketoprofen	pKa	4.13	4.25	monoacid
19	(2008) Eur. J. Pharm. Sci., 33, 230-240	ketoprofen	pKa	4.25
20	(2009) Eur. J. Med. Chem., 44, 4455-4460	ketoprofen	pKa	4.6
21	(2010) J. Med. Chem., 53, 3566-3584	ketoprofen	pKa	4.02
22	(2007) Adv. Drug Deliver. Rev., 59, 568-590	naproxen	pKa	4.45	4.226	monoacid
23	(2008) Eur. J. Pharm. Sci., 33, 230-240	naproxen	pKa	4.18
24	(2009) Eur. J. Med. Chem., 44, 4455-4460	naproxen	pKa	4.2
25	(2010) J. Med. Chem., 53, 3566-3584	naproxen	pKa	4
26	(2011) J. Assoc. Lab. Autom., 16, 276-284	naproxen	pKa	4.3
27	(2009) Eur. J. Med. Chem., 44, 4455-4460	nifedipine	pKa			neutral
28	(2011) J. Assoc. Lab. Autom., 16, 276-284	nifedipine	pKa
29	(2007) Adv. Drug Deliver. Rev., 59, 568-590	phenytoin	pKa	8.21	8.0625	monoacid
30	(2008) Eur. J. Pharm. Sci., 33, 230-240	phenytoin	pKa	7.94
31	(2009) Eur. J. Med. Chem., 44, 4455-4460	phenytoin	pKa	8
32	(2011) J. Assoc. Lab. Autom., 16, 276-284	phenytoin	pKa	8.1
33	(2008) Eur. J. Pharm. Sci., 33, 230-240	pindolol	pKa	9.54	9.54	monobase
34	(2009) Eur. J. Med. Chem., 44, 4455-4460	prazosin	pKa	6.5	6.5	monobase
35	(2009) Eur. J. Med. Chem., 44, 4455-4460	trimethoprim	pKa	7.26	7.26	monobase
36	(2006) J. Pharm. Sci., 95, 1298-1307	warfarin	pKa	4.94	4.965	monoacid
37	(2008) Eur. J. Pharm. Sci., 33, 230-240	warfarin	pKa	4.82
38	(2009) Eur. J. Med. Chem., 44, 4455-4460	warfarin	pKa	5.1
39	(2011) J. Assoc. Lab. Autom., 16, 276-284	warfarin	pKa	5

## Sheet: Raw solubility
Number	Journal	Drug	Parameter	Value	Mwt	pKa	Charge Type	Intrinsic solubility (M)	Solubility6.5 (M)	Solubility6.6 (M)	Solubility7.4 (M)	Log10(Solubility7.4 (M))	Solubility7.4 (M)		Drug	Solubility7.4 (M)
1	(2006) J. Pharm. Sci., 95, 1298-1307	chlorpromazine	log(intrinsic S) (mol L-1)	-5.12	318.873	9.24	monobase	7.58578e-06			0.000532393	-3.27377	0.000372059		chlorpromazine	0.000372
2	(2008) Eur. J. Pharm. Sci., 33, 230-240	chlorpromazine	Intrinsic solubility (micrograms mL-1)	0.9	318.873	9.24	monobase	2.82244e-06			0.000198088	-3.70314			diazepam	0.000157
3	(2009) Eur. J. Pharm. Sci., 37, 172-182	chlorpromazine	solubility (microMolar) @ pH7.4	446	318.873	9.24	monobase				0.000446	-3.35067			diclofenac	0.00653
4	CHEMBL3301361	chlorpromazine	solubility (nM) @ pH7.4	407400	318.873	9.24	monobase				0.0004074	-3.38998			furosemide	0.178
5	(2007) Mol. Pharm., 5, 266-279	diazepam	log(intrinsic S) (mol L-1)	-3.75	284.746		neutral	0.000177828			0.000177828	-3.75	0.000156653		haloperidol	7.56e-05
6	CHEMBL3301361	diazepam	solubility (nM) @ pH7.4	138000	284.746		neutral				0.000138	-3.86012			imipramine	0.00985
7	(2007) Adv. Drug Deliver. Rev., 59, 546-567	diclofenac	S (micrograms mL-1) @ pH6.5	366	296.153	4.26	monoacid	7.07087e-06	0.00123585		0.00976759	-2.01021	0.00652501		indomethacin	0.00144
8	(2007) Adv. Drug Deliver. Rev., 59, 568-590	diclofenac	Intrinsic solubility (micrograms mL-1)	0.82	296.153	4.26	monoacid	2.76884e-06			0.00382483	-2.41739			ketoprofen	0.555
9	(2007) Mol. Pharm., 5, 266-279	diclofenac	log(intrinsic S) (mol L-1)	-5.34	296.153	4.26	monoacid	4.57088e-06			0.00631414	-2.19969			naproxen	0.0987
10	(2008) Eur. J. Pharm. Sci., 33, 230-240	diclofenac	Intrinsic solubility (micrograms mL-1)	1.1	296.153	4.26	monoacid	3.7143e-06			0.00513087	-2.28981			nifedipine	5.23e-05
11	(2011) J. Assoc. Lab. Autom., 16, 276-284	diclofenac	log(s) (microMolar) @ pH7.4	3.99	296.153	4.26	monoacid				0.00977237	-2.01			phenytoin	8.51e-05
12	(2006) J. Pharm. Sci., 95, 1298-1307	furosemide	log(intrinsic S) (mol L-1)	-4.21	330.749	3.94	monoacid	6.16595e-05			0.17789	-0.749849	0.17789		pindolol	0.0262
13	(2009) Eur. J. Pharm. Sci., 37, 172-182	haloperidol	solubility (microMolar) @ pH7.4	52	375.871	8.63	monobase				5.2e-05	-4.284	7.5616e-05		prazosin	1.48e-05
14	(2011) J. Assoc. Lab. Autom., 16, 276-284	haloperidol	log(s) (microMolar) @ pH7.4	2.22	375.871	8.63	monobase				0.000165959	-3.78			trimethoprim	0.00217
15	CHEMBL3301361	haloperidol	solubility (nM) @ pH7.4	50100	375.871	8.63	monobase				5.01e-05	-4.30016			warfarin	0.00335
16	(2006) J. Pharm. Sci., 95, 1298-1307	imipramine	log(intrinsic S) (mol L-1)	-4.11	280.415	9.5	monobase	7.76247e-05			0.00985	-2.00656	0.00985
17	(2007) J. Med. Chem., 50, 5858-5862	indomethacin	Intrinsic solubility (nM)	1133.3	357.793	4.31	monoacid	1.1333e-06			0.0013954	-2.8553	0.00143766
18	(2008) Eur. J. Pharm. Sci., 33, 230-240	indomethacin	Intrinsic solubility (micrograms mL-1)	0.9	357.793	4.31	monoacid	2.51542e-06			0.00309716	-2.50904
19	(2010) J. Med. Chem., 53, 5165-5178	indomethacin	solubility (microgram mL-1) @ pH7.4	246	357.793	4.31	monoacid				0.000687548	-3.1627
20	(2007) Adv. Drug Deliver. Rev., 59, 568-590	ketoprofen	Intrinsic solubility (micrograms mL-1)	118	254.285	4.25	monoacid	0.000464046			0.655947	-0.183131	0.55508
21	(2008) Eur. J. Pharm. Sci., 33, 230-240	ketoprofen	Intrinsic solubility (micrograms mL-1)	84.5	254.285	4.25	monoacid	0.000332304			0.469725	-0.328157
22	(2007) Adv. Drug Deliver. Rev., 59, 568-590	naproxen	Intrinsic solubility (micrograms mL-1)	14	230.263	4.23	monoacid	6.08e-05			0.0899907	-1.0458	0.0987321
23	(2007) Mol. Pharm., 5, 266-279	naproxen	log(intrinsic S) (mol L-1)	-4.15	230.263	4.23	monoacid	7.07946e-05			0.104784	-0.979706
24	(2008) Eur. J. Pharm. Sci., 33, 230-240	naproxen	Intrinsic solubility (micrograms mL-1)	18	230.263	4.23	monoacid	7.81715e-05			0.115702	-0.936658
25	(2011) J. Assoc. Lab. Autom., 16, 276-284	naproxen	log(s) (microMolar) @ pH7.4	4.94	230.263	4.23	monoacid				0.0870964	-1.06
26	(2007) Adv. Drug Deliver. Rev., 59, 546-567	nifedipine	S (micrograms mL-1) @ pH6.5	40	346.339		neutral	0.000115494	0.000115494		0.000115494	-3.93744	5.22641e-05
27	(2009) Eur. J. Pharm. Sci., 37, 172-182	nifedipine	solubility (microMolar) @ pH7.4	166	346.339		neutral				0.000166	-3.77989
28	(2011) J. Assoc. Lab. Autom., 16, 276-284	nifedipine	log(s) (microMolar) @ pH7.4	1.27	346.339		neutral				1.86209e-05	-4.73
29	CHEMBL3301361	nifedipine	solubility (nM) @ pH7.4	20900	346.339		neutral				2.09e-05	-4.67985
30	(2007) Adv. Drug Deliver. Rev., 59, 546-567	phenytoin	S (micrograms mL-1) @ pH6.6	17	252.273	8.06	monoacid	6.51291e-05		6.73873e-05	7.93777e-05	-4.1003	8.5141e-05
31	(2007) Adv. Drug Deliver. Rev., 59, 568-590	phenytoin	Intrinsic solubility (micrograms mL-1)	19	252.273	8.06	monoacid	7.53152e-05			9.17924e-05	-4.03719
32	(2008) Eur. J. Pharm. Sci., 33, 230-240	phenytoin	Intrinsic solubility (micrograms mL-1)	26.3	252.273	8.06	monoacid	0.000104252			0.00012706	-3.89599
33	(2009) Eur. J. Pharm. Sci., 37, 172-182	phenytoin	solubility (microMolar) @ pH7.4	86	252.273	8.06	monoacid				8.6e-05	-4.0655
34	(2011) J. Assoc. Lab. Autom., 16, 276-284	phenytoin	log(s) (microMolar) @ pH7.4	1.78	252.273	8.06	monoacid				6.0256e-05	-4.22
35	CHEMBL3301361	phenytoin	solubility (nM) @ pH7.4	79400	252.273	8.06	monoacid				7.94e-05	-4.10018
36	(2008) Eur. J. Pharm. Sci., 33, 230-240	pindolol	Intrinsic solubility (micrograms mL-1)	46.8	248.326	9.54	monobase	0.000188462			0.0262035	-1.58164	0.0262035
37	CHEMBL3301361	prazosin	solubility (nM) @ pH7.4	14800	383.408	6.5	monobase				1.48e-05	-4.82974	1.48e-05
38	(2007) Mol. Pharm., 5, 266-279	trimethoprim	log(intrinsic S) (mol L-1)	-2.9	290.323	7.26	monobase	0.00125893			0.00217094	-2.66335	0.00217094
39	(2006) J. Pharm. Sci., 95, 1298-1307	warfarin	log(intrinsic S) (mol L-1)	-4.77	308.333	4.97	monoacid	1.69824e-05			0.00458786	-2.33839	0.00335079
40	(2008) Eur. J. Pharm. Sci., 33, 230-240	warfarin	Intrinsic solubility (micrograms mL-1)	4.8	308.333	4.97	monoacid	1.55676e-05			0.00420564	-2.37617
41	(2011) J. Assoc. Lab. Autom., 16, 276-284	warfarin	log(s) (microMolar) @ pH7.4	3.29	308.333	4.97	monoacid				0.00194984	-2.71

## Sheet: Raw Caco2 A2B
Number	Journal	Drug	Parameter	Value	Caco2 A2B pH6.5 (cm s-1 )		Drug	Caco2 A2B pH6.5 (cm s-1 )
1	(2011) Bioorg. Med. Chem., 19, 2615-2624	chlorpromazine	logPapp	-4.7	1.99526e-05		chlorpromazine	2e-05
2	(2011) Bioorg. Med. Chem., 19, 2615-2624	diazepam	logPapp	-4.22	6.0256e-05		diazepam	6.03e-05
3	(2011) Bioorg. Med. Chem., 19, 2615-2624	diclofenac	logPapp	-4.27	5.37032e-05		diclofenac	5.37e-05
4	(2011) Bioorg. Med. Chem., 19, 2615-2624	furosemide	logPapp	-6.55	2.81838e-07		furosemide	2.82e-07
5	(2011) Bioorg. Med. Chem., 19, 2615-2624	haloperidol	logPapp	-4.8	1.58489e-05		haloperidol	1.58e-05
6	(2011) Bioorg. Med. Chem., 19, 2615-2624	imipramine	logPapp	-4.56	2.75423e-05		imipramine	2.75e-05
7	(2011) Bioorg. Med. Chem., 19, 2615-2624	indomethacin	logPapp	-4.53	2.95121e-05		indomethacin	2.95e-05
8	(2011) Bioorg. Med. Chem., 19, 2615-2624	ketoprofen	logPapp	-4.33	4.67735e-05		ketoprofen	4.68e-05
9	(2011) Bioorg. Med. Chem., 19, 2615-2624	naproxen	logPapp	-4.33	4.67735e-05		naproxen	4.68e-05
10	(2011) Bioorg. Med. Chem., 19, 2615-2624	nifedipine	logPapp	-4.49	3.23594e-05		nifedipine	3.24e-05
11	(2011) Bioorg. Med. Chem., 19, 2615-2624	phenytoin	logPapp	-4.4	3.98107e-05		phenytoin	3.98e-05
12	(2011) Bioorg. Med. Chem., 19, 2615-2624	pindolol	logPapp	-4.41	3.89045e-05		pindolol	3.89e-05
13	(2011) Bioorg. Med. Chem., 19, 2615-2624	prazosin	logPapp	-5.39	4.0738e-06		prazosin	4.07e-06
14	(2011) Bioorg. Med. Chem., 19, 2615-2624	trimethoprim	logPapp	-4.06	8.70964e-05		trimethoprim	8.71e-05
15	(2011) Bioorg. Med. Chem., 19, 2615-2624	warfarin	logPapp	-4.36	4.36516e-05		warfarin	4.37e-05

## Sheet: Raw Vss
Number	Journal	Drug	Parameter	Value	Log10(Vss (L kg-1 ))	Vss (L kg-1)		Drug	Vss (L kg-1)
1	(2008) Drug Metab. Dispos., 36, 1385-1405	chlorpromazine	Human Vss	10	1	10		chlorpromazine	10
2	(2008) Drug Metab. Dispos., 36, 1385-1405	diazepam	Human Vss	1	0	1		diazepam	1
3	(2008) Drug Metab. Dispos., 36, 1385-1405	diclofenac	Human Vss	0.22	-0.657577	0.193391		diclofenac	0.19
4	(2005) J Pharm Sci, 94, 1467-1483	diclofenac	Human Vss	0.17	-0.769551			furosemide	0.11
5	(2008) Drug Metab. Dispos., 36, 1385-1405	furosemide	Human Vss	0.12	-0.920819	0.114891		haloperidol	17
6	(2005) J Pharm Sci, 94, 1467-1483	furosemide	Human Vss	0.11	-0.958607			imipramine	12
7	(2008) Drug Metab. Dispos., 36, 1385-1405	haloperidol	Human Vss	17	1.23045	17		indomethacin	0.16
8	(2008) Drug Metab. Dispos., 36, 1385-1405	imipramine	Human Vss	12	1.07918	12		ketoprofen	0.13
9	(2008) Drug Metab. Dispos., 36, 1385-1405	indomethacin	Human Vss	0.096	-1.01773	0.157987		naproxen	0.09
10	(2005) J Pharm Sci, 94, 1467-1483	indomethacin	Human Vss	0.26	-0.585027			nifedipine	0.79
11	(2008) Drug Metab. Dispos., 36, 1385-1405	ketoprofen	Human Vss	0.13	-0.886057	0.13		phenytoin	1.4
12	(2005) J Pharm Sci, 94, 1467-1483	naproxen	Human Vss	0.09	-1.04576	0.09		pindolol	1.2
13	(2008) Drug Metab. Dispos., 36, 1385-1405	nifedipine	Human Vss	0.79	-0.102373	0.79		prazosin	0.73
14	(2005) J Pharm Sci, 94, 1467-1483	phenytoin	Human Vss	1.4	0.146128	1.4		trimethoprim	1.5
15	(2008) Drug Metab. Dispos., 36, 1385-1405	pindolol	Human Vss	1.2	0.0791812	1.2		warfarin	0.12
16	(2008) Drug Metab. Dispos., 36, 1385-1405	prazosin	Human Vss	0.73	-0.136677	0.73
17	(2008) Drug Metab. Dispos., 36, 1385-1405	trimethoprim	Human Vss	1.5	0.176091	1.5
18	(2008) Drug Metab. Dispos., 36, 1385-1405	warfarin	Human Vss	0.13	-0.886057	0.119583
19	(2005) J Pharm Sci, 94, 1467-1483	warfarin	Human Vss	0.11	-0.958607

## Sheet: Raw Cl
Number	Journal	Drug	Parameter	Value	Log10(Cl (mL min-1 kg-1 ))	Cl (mL min-1 kg-1)		Drug	Cl (mL min-1 kg-1)
1	(2009) J. Med. Chem., 52, 4844-4852	chlorpromazine	Human Cl	16	1.20412	16		chlorpromazine	16
2	(2009) J. Med. Chem., 52, 4844-4852	diazepam	Human Cl	0.38	-0.420216	0.38		diazepam	0.38
3	(2005) J Pharm Sci, 94, 1467-1483	diclofenac	Human Cl	4.2	0.623249	3.83406		diclofenac	3.83
4	(2009) J. Med. Chem., 52, 4844-4852	diclofenac	Human Cl	3.5	0.544068			furosemide	2.19
5	(2005) J Pharm Sci, 94, 1467-1483	furosemide	Human Cl	2	0.30103	2.19089		haloperidol	7.8
6	(2009) J. Med. Chem., 52, 4844-4852	furosemide	Human Cl	2.4	0.380211			imipramine	13
7	(2009) J. Med. Chem., 52, 4844-4852	haloperidol	Human Cl	7.8	0.892095	7.8		indomethacin	1.61
8	(2009) J. Med. Chem., 52, 4844-4852	imipramine	Human Cl	13	1.11394	13		ketoprofen	1.6
9	(2005) J Pharm Sci, 94, 1467-1483	indomethacin	Human Cl	2	0.30103	1.61245		naproxen	0.07
10	(2009) J. Med. Chem., 52, 4844-4852	indomethacin	Human Cl	1.3	0.113943			nifedipine	7.3
11	(2009) J. Med. Chem., 52, 4844-4852	ketoprofen	Human Cl	1.6	0.20412	1.6		phenytoin	0.57
12	(2005) J Pharm Sci, 94, 1467-1483	naproxen	Human Cl	0.07	-1.1549	0.07		pindolol	7.7
13	(2009) J. Med. Chem., 52, 4844-4852	nifedipine	Human Cl	7.3	0.863323	7.3		prazosin	4.7
14	(2005) J Pharm Sci, 94, 1467-1483	phenytoin	Human Cl	0.57	-0.244125	0.57		trimethoprim	2.1
15	(2009) J. Med. Chem., 52, 4844-4852	pindolol	Human Cl	7.7	0.886491	7.7		warfarin	0.05
16	(2009) J. Med. Chem., 52, 4844-4852	prazosin	Human Cl	4.7	0.672098	4.7
17	(2009) J. Med. Chem., 52, 4844-4852	trimethoprim	Human Cl	2.1	0.322219	2.1
18	(2005) J Pharm Sci, 94, 1467-1483	warfarin	Human Cl	0.04	-1.39794	0.0469042
19	(2009) J. Med. Chem., 52, 4844-4852	warfarin	Human Cl	0.055	-1.25964

## Sheet: Raw PPB
Number	Journal	Drug	Parameter	Value	PPB (% bound)		Drug	PPB (% bound)
1	CHEMBL3301361	chlorpromazine	Human PPB	98.64	98.64		chlorpromazine	98.64
2	CHEMBL3301361	diazepam	Human PPB	98.61	98.61		diazepam	98.61
3	CHEMBL3301361	diclofenac	Human PPB	99.68	99.68		diclofenac	99.68
4	CHEMBL3301361	furosemide	Human PPB	98.37	98.37		furosemide	98.37
5	CHEMBL3301361	haloperidol	Human PPB	85.48	85.48		haloperidol	85.48
6	CHEMBL3301361	imipramine	Human PPB	87.87	87.87		imipramine	87.87
7		indomethacin					indomethacin
8	CHEMBL3301361	ketoprofen	Human PPB	98.73	98.73		ketoprofen	98.73
9		naproxen					naproxen
10	CHEMBL3301361	nifedipine	Human PPB	96.17	96.17		nifedipine	96.17
11	CHEMBL3301361	phenytoin	Human PPB	87.11	87.11		phenytoin	87.11
12		pindolol					pindolol
13	CHEMBL3301361	prazosin	Human PPB	96	96		prazosin	96
14	CHEMBL3301361	trimethoprim	Human PPB	66.1	66.1		trimethoprim	66.1
15	CHEMBL3301361	warfarin	Human PPB	99.31	99.31		warfarin	99.31
