# Supplementary material for: Oral drug suitability parameters
Source: Medchemcomm. 2018 Feb 5;9(3):460–70. doi: 10.1039/c7md00586e (PMC6072407; doi:10.1039/c7md00586e)
Supplement: Supplementary file 3 [file MD-009-C7MD00586E-s003.xlsx]

## Sheet: Summary_paper
synonym	charge_type	pka_a1 (J. Med. Chem., 2010, 53, 3566)	pka_b1 (J. Med. Chem., 2010, 53, 3566)	pKa comment (J. Med. Chem., 2010, 53, 3566)	fraction neutral pH6.5 (fn)	caco2_pH6p5 (A to B) (cm s-1) (J. Med. Chem., 2010, 53, 3566)	caco2_pH6p5 (A to B) (cm s-1) (Eur. J. Pharm. Sci., 2013, 49, 679)	caco2_pH6p5 (A to B) (cm s-1)	(human) peff_pH6p5 (cm s-1) (J. Med. Chem., 2010, 53, 3566)	pabl (caco2_pH6.5 (cm s-1)) (average based upon Eur. J. Pharm. Sci., 2013, 49, 679)	pabl (peff_pH6.5 (cm s-1)) (average based upon Eur. J. Pharm. Sci., 2013, 49, 679)	pm (caco2_pH6p5 (A to B) (cm s-1))	pm (human_pH6p5 (cm s-1))	pm (caco2_neutral_pH6.5 (A to B) (cm s-1))	pm_(human_neutral_pH6p5 (cm s-1))	log10(pm_(caco2_neutral_pH6.5 (cm s-1)))	log10(pm_(human_neutral_pH6p5 (cm s-1)))	Use in regression
acetaminophen	neutral				1	9.12011e-05		9.12011e-05	0.000176	0.000247	0.000835	0.000144588	0.000223005	0.000144588	0.000223005	-3.83987	-3.65169	Yes
alpha-methyl-DOPA	zwitterion	2.21	8.94		1.85526e-07	3.98107e-07		3.98107e-07	1.5e-05	0.000247	0.000835	3.9875e-07	1.52744e-05	2.1493	82.3304	0.332297	1.91556	Yes
amiloride	monobase		8.65		0.00702969	1.90546e-07		1.90546e-07	0.000163	0.000247	0.000835	1.90693e-07	0.000202537	2.71268e-05	0.0288117	-4.5666	-1.54043	Yes
amoxicillin	zwitterion	2.6	7		3.02423e-05	1.62181e-06		1.62181e-06	3.2e-05	0.000247	0.000835	1.63253e-06	3.32752e-05	0.0539817	1.10029	-1.26775	0.0415066	Yes
antipyrine	neutral				1	0.000123027		0.000123027	0.0005205	0.000247	0.000835	0.000245115	0.00138193	0.000245115	0.00138193	-3.61063	-2.85951	Yes
atenolol	monobase		9.19		0.00203758	9.12011e-08		9.12011e-08	2.1e-05	0.000247	0.000835	9.12348e-08	2.15418e-05	4.47761e-05	0.0105722	-4.34895	-1.97583	Yes
benserazide	monobase		7.97	Approximation – dibase	0.0327739	1.25893e-05		1.25893e-05	0.00029	0.000247	0.000835	1.32654e-05	0.000444312	0.000404754	0.0135569	-3.39281	-1.86784	Yes
cephalexin	zwitterion	2.55	7.05		2.46671e-05	7.24436e-07		7.24436e-07	0.000156	0.000247	0.000835	7.26567e-07	0.000191841	0.0294549	7.7772	-1.53084	0.890823	Yes
cimetidine	monobase		6.76		0.354648	5.37032e-07	5.5e-07	5.43516e-07	4.43e-05	0.000247	0.000835	5.44715e-07	4.6782e-05	1.53593e-06	0.000131911	-5.81363	-3.87972	Yes
creatinine	monobase		4.66		0.985752	9.77237e-07		9.77237e-07	2.95e-05	0.000247	0.000835	9.81119e-07	3.05804e-05	9.953e-07	3.10224e-05	-6.00205	-4.50832	Yes
cyclosporine A	neutral				1	6.91831e-06		6.91831e-06	0.000163	0.000247	0.000835	7.11767e-06	0.000202537	7.11767e-06	0.000202537	-5.14766	-3.6935	Yes
desipramine	monobase		9.8		0.000500936	8.91251e-06	1.6e-05	1.24563e-05	0.000445	0.000247	0.000835	1.31178e-05	0.000952756	0.0261865	1.90195	-1.58192	0.279199	Yes
enalapril	zwitterion	2.92	5.57		0.000235311	2.18776e-06		2.18776e-06	0.000157	0.000247	0.000835	2.20731e-06	0.000193355	0.00938041	0.821702	-2.02778	-0.0852858	Yes
enalaprilat	zwitterion	3.2	7.6	Approximation – diacid monobase	3.68627e-05	1.54882e-09		1.54882e-09	2e-05	0.000247	0.000835	1.54883e-09	2.04908e-05	4.20161e-05	0.555869	-4.37658	-0.255028	Yes
fexofenadine	zwitterion	4.2	7.84		0.000217981	4.7863e-07		4.7863e-07	8e-06	0.000247	0.000835	4.79559e-07	8.07739e-06	0.00220001	0.0370555	-2.65758	-1.43115	Yes
furosemide	monoacid	3.51			0.00102225	2.88403e-07	2e-07	2.44202e-07	2.5e-05	0.000247	0.000835	2.44443e-07	2.57716e-05	0.000239123	0.0252107	-3.62138	-1.59841	Yes
griseofulvin	neutral				1	3.63078e-05		3.63078e-05	0.000114	0.000247	0.000835	4.25646e-05	0.000132025	4.25646e-05	0.000132025	-4.37095	-3.87934	Yes
hydrochlorothiazide	neutral				1	5.24807e-07	3e-07	4.12404e-07	1.15e-05	0.000247	0.000835	4.13093e-07	1.16606e-05	4.13093e-07	1.16606e-05	-6.38395	-4.93328	Yes
inogatran	zwitterion	2	12.5	Approximation – monoacid dibase	3.16217e-11	6.30957e-08	6.1e-08	6.20479e-08	3e-06	0.000247	0.000835	6.20635e-08	3.01082e-06	1962.68	95213.5	3.29285	4.9787	Yes
L-DOPA	zwitterion	2.21	8.54		4.63484e-07	1.14815e-06		1.14815e-06	0.000340333	0.000247	0.000835	1.15352e-06	0.000574485	2.48879	1239.49	0.395989	3.09324	Yes
L-leucine	zwitterion	2.38	9.61		5.88342e-08	1.25893e-05		1.25893e-05	0.00062	0.000247	0.000835	1.32654e-05	0.00240791	225.47	40927	2.35309	4.61201	Yes
L-phenylalanine	zwitterion	2.2	8.92		1.89815e-07	2.34423e-05		2.34423e-05	0.00040725	0.000247	0.000835	2.59004e-05	0.000794982	136.451	4188.2	2.13498	3.62203	Yes
lisinopril	zwitterion	3.16	10.5	Approximation – diacid dibase	4.56834e-08	1.41254e-06		1.41254e-06	3.3e-05	0.000247	0.000835	1.42066e-06	3.43579e-05	31.098	752.087	1.49273	2.87627	Yes
losartan	monoacid	4.25			0.00559197	2.39883e-06		2.39883e-06	0.000114	0.000247	0.000835	2.42236e-06	0.000132025	0.000433185	0.0236098	-3.36333	-1.62691	Yes
metoprolol	monobase		9.18		0.00208494	1.99526e-05	1.3e-05	1.64763e-05	0.0001164	0.000247	0.000835	1.76539e-05	0.000135255	0.00846736	0.0648722	-2.07225	-1.18794	Yes
piroxicam	monoacid	5.34			0.0647065	0.000251189	9.1e-05	0.000171094	0.000706267	0.000247	0.000835	0.000556748	0.00458104	0.0086042	0.0707972	-2.06529	-1.14998	Yes
propranolol	monobase		9.17		0.0021334	3.46737e-05	1.8e-05	2.63368e-05	0.00030352	0.000247	0.000835	2.94802e-05	0.000476856	0.0138184	0.223519	-1.85954	-0.650686	Yes
ranitidine	monobase		8		0.0306534	1.25893e-09		1.25893e-09	3.715e-05	0.000247	0.000835	1.25893e-09	3.88798e-05	4.10699e-08	0.00126837	-7.38648	-2.89676	Yes
salicylic acid	monoacid	2.88			0.000239826	7.58578e-05		7.58578e-05	0.000267	0.000247	0.000835	0.000109481	0.000392509	0.456503	1.63664	-0.340556	0.213954	Yes
terbutaline	monobase		9.97		0.000338729	5.49541e-08		5.49541e-08	3e-05	0.000247	0.000835	5.49663e-08	3.1118e-05	0.000162272	0.0918669	-3.78976	-1.03684	Yes
urea	neutral				1	8.91251e-07		8.91251e-07	0.00014	0.000247	0.000835	8.94478e-07	0.000168201	8.94478e-07	0.000168201	-6.04843	-3.77417	Yes
valacyclovir	monobase		7.4		0.111816	1.47911e-06		1.47911e-06	0.000166	0.000247	0.000835	1.48802e-06	0.00020719	1.33078e-05	0.00185296	-4.87589	-2.73213	Yes
verapamil	monobase		8.76		0.00546537	2.69153e-05		2.69153e-05	0.0006296	0.000247	0.000835	3.0207e-05	0.00255947	0.00552697	0.468307	-2.25751	-0.329469	Yes
carbamazepine	neutral				1	0.000724436	3.6e-05	0.000380218	0.00043	0.000247	0.000835	-0.000704964	0.000886543	-0.000704964	0.000886543	Error 1	-3.0523	No
D-glucose	neutral				1	2.0893e-05		2.0893e-05	0.000943167	0.000247	0.000835	2.28235e-05	-0.00728084	2.28235e-05	-0.00728084	-4.64162	Error 2	No
fluvastatin	monoacid	4.31			0.00641512	0.000269153		0.000269153	0.000238	0.000247	0.000835	-0.00300092	0.000332881	-0.467789	0.0518901	Error 1	-1.28492	No
ketoprofen	monoacid	4.02			0.00330038	0.000177828		0.000177828	0.000845	0.000247	0.000835	0.000634989	-0.0705575	0.192399	-21.3786	-0.715798	Error 2	No
naproxen	monoacid	4			0.00315231	0.000467735		0.000467735	0.000896	0.000247	0.000835	-0.00052339	-0.0122649	-0.166034	-3.89077	Error 1	Error 2	No
quercetin-3-4'-diglucoside	monoacid	6.9			0.715253	1.99526e-07		1.99526e-07	0.00089	0.000247	0.000835	1.99688e-07	-0.0135118	2.79185e-07	-0.018891	-6.55411	Error 2	No
retinoic acid	monoacid	4.52			0.0103628	0.00144544		0.00144544	9.9e-05	0.000247	0.000835	-0.000297907	0.000112317	-0.0287478	0.0108385	Error 1	-1.96503	No
sulforaphane	neutral				1	0.000141254		0.000141254	0.00187	0.000247	0.000835	0.000329938	-0.00150865	0.000329938	-0.00150865	-3.48157	Error 2	No
Notes
Excluded PEG and water details from J. Med. Chem., 2010, 53, 3566.
Considered acidic pKa <= 8.5.
Considered basic pKa >= 4.5.
A dibase was approximated to a monobase.
Amphoteric compounds with more than 2 pKas approximated to a zwitterion.
“Error 1” occurs when caco2_pH6.5 >= pabl (caco2_pH6.5): exclude from regression
“Error 2” occurs when peff_pH6.5 >= pabl (peff_pH6.5): exclude from regression
