# Supplementary material for: Oral drug suitability parameters
Source: Medchemcomm. 2018 Feb 5;9(3):460–70. doi: 10.1039/c7md00586e (PMC6072407; doi:10.1039/c7md00586e)
Supplement: Supplementary file 6 [file MD-009-C7MD00586E-s006.xlsx]

## Sheet: Fig. 4a
hld	chlorpromazine_dqi	diazepam_dqi	diclofenac_dqi	furosemide_dqi	haloperidol_dqi	imipramine_dqi	indomethacin_dqi	ketoprofen_dqi	naproxen_dqi	nifedipine_dqi	phenytoin_dqi	pindolol_dqi	prazosin_dqi	trimethoprim_dqi	warfarin_dqi
2.1564	-2.20375
2.60974	-2.75274
3.05048	-3.19087
3.1026	-3.1824
2.93519	-2.9813
2.1564	-2.20375
1.52886		-0.577904
1.53591		-0.792741
1.98736		-1.21074
1.97831		-1.1908
1.95378		-1.11597
1.52886		-0.577904
1.83674			-1.03333
2.02226			-1.21624
2.15042			-1.33913
2.14462			-1.33239
2.05927			-1.23863
1.83674			-1.03333
2.94729				-1.78397
2.95852				-1.79977
2.96655				-1.8017
2.96407				-1.79306
2.96242				-1.79134
2.94729				-1.78397
1.7357					-1.77649
1.81047					-2.05214
2.53648					-2.69329
2.52248					-2.67441
2.48444					-2.56875
1.7357					-1.77649
3.42886						-1.84224
3.56826						-2.41198
4.04205						-2.97267
4.05508						-2.97569
4.0277						-2.7802
3.42886						-1.84224
1.2935							-0.839378
1.56116							-1.04903
1.65051							-1.11364
1.62007							-1.08514
1.47485							-0.974261
1.2935							-0.839378
3.79698								-0.818805
3.93626								-1.06537
3.92733								-1.03857
3.92551								-0.977386
3.8625								-0.921687
3.79698								-0.818805
3.74449									-0.324679
3.79945									-0.403071
3.80602									-0.410147
3.79338									-0.377495
3.77814									-0.335832
3.74449									-0.324679
0.604552										-1.45001
0.808166										-1.6972
0.930897										-1.81583
1.14265										-1.91827
1.06792										-1.85041
0.604552										-1.45001
0.926766											-0.635786
1.03693											-0.925868
1.40441											-1.38022
1.39753											-1.35981
1.38107											-1.27474
0.926766											-0.635786
3.96478												-1.97473
4.10864												-2.07198
4.1348												-1.9803
4.18137												-1.7067
4.07196												-1.83704
3.96478												-1.97473
0.170104													-1.44476
0.80855													-1.91582
0.771968													-1.8781
0.683766													-1.76074
0.584569													-1.68472
0.170104													-1.44476
2.97419														-0.88187
3.2309														-1.29202
3.68031														-1.73952
3.72653														-1.73614
3.5727														-1.53612
2.97419														-0.88187
2.3439															-0.231924
2.39629															-0.333883
2.39318															-0.322302
2.38789															-0.304587
2.3737															-0.260498
2.3439															-0.231924

## Sheet: Fig. 4b
hld	chlorpromazine_dqi	diazepam_dqi	diclofenac_dqi	furosemide_dqi	haloperidol_dqi	imipramine_dqi	ketoprofen_dqi	nifedipine_dqi	phenytoin_dqi	prazosin_dqi	trimethoprim_dqi	warfarin_dqi
2.15578	-4.07021
2.60974	-4.6192
3.06519	-5.072
3.10313	-5.04939
2.94296	-4.85553
2.15578	-4.07021
1.47679		-2.59061
1.98757		-3.06773
1.97913		-3.04779
1.95507		-2.97295
1.53042		-2.43489
1.47679		-2.59061
1.95685			-3.64828
2.18721			-3.87078
2.14462			-3.82724
2.05927			-3.73348
2.03307			-3.7219
1.95685			-3.64828
2.94727				-3.57176
2.95852				-3.58758
2.96652				-3.58949
2.96319				-3.57999
2.96181				-3.57854
2.94727				-3.57176
1.56401					-2.44283
1.81047					-2.89017
2.53629					-3.53114
2.52174					-3.5117
2.48369					-3.40604
1.56401					-2.44283
3.55544						-3.32811
4.04198						-3.8893
4.05573						-3.89223
4.02918						-3.69817
3.57164						-2.90373
3.55544						-3.32811
3.77348							-2.69151
3.88711							-2.91242
3.92733							-2.93477
3.92551							-2.87358
3.8625							-2.81788
3.77348							-2.69151
0.517592								-2.77985
0.822224								-3.13834
0.929951								-3.23263
1.11868								-3.31797
1.15008								-3.3425
0.517592								-2.77985
0.902173									-1.52553
1.08289									-1.85819
1.40441									-2.26996
1.39753									-2.24956
1.38107									-2.16449
0.902173									-1.52553
0.104129										-2.77673
0.802255										-3.30746
0.77679										-3.27702
0.684065										-3.15868
0.584569										-3.08266
0.104129										-2.77673
3.06095											-1.43844
3.37522											-1.90614
3.67894											-2.20795
3.72399											-2.20341
3.5727											-2.00592
3.06095											-1.43844
2.34482												-2.39307
2.39652												-2.49503
2.39371												-2.48345
2.3885												-2.46574
2.37499												-2.42165
2.34482												-2.39307

## Sheet: Fig. 5
hld	chlorpromazine_dqi	diazepam_dqi	ketoprofen_dqi	nifedipine_dqi	trimethoprim_dqi	warfarin_dqi
2.07061	-2.86514
2.0827	-3.53096
2.11689	-3.52035
2.12705	-3.38293
2.14604	-3.46335
2.15678	-3.43201
2.16417	-3.42756
2.16702	-3.42561
2.17119	-3.42807
2.17652	-3.636
2.17889	-3.42391
2.18487	-3.41073
2.19432	-3.54606
2.20549	-3.40691
2.21098	-3.50519
2.21671	-3.49165
2.22483	-3.48445
2.23028	-3.47039
2.23325	-3.48804
2.24523	-3.47639
2.54492	-3.79316
2.56268	-3.96413
2.56395	-2.91901
2.56424	-3.48434
2.57341	-3.91813
2.57781	-3.1363
2.57859	-3.95222
2.5848	-3.95912
2.58946	-3.82475
2.5931	-3.83013
2.59547	-3.95428
2.60954	-3.88439
2.61462	-4.06704
2.61821	-4.15371
2.62828	-3.96586
2.6343	-3.95424
2.63889	-3.86827
2.6396	-3.98999
2.64575	-2.99692
2.65116	-3.91669
2.65971	-3.32729
2.66022	-3.92312
2.66426	-3.9434
2.66626	-4.16008
2.6705	-3.18612
2.6742	-3.92058
2.67664	-3.43904
2.68336	-4.04037
2.72136	-2.79963
2.72513	-3.96115
2.73341	-4.15412
2.74449	-4.19969
2.76798	-2.79975
2.77362	-3.98772
2.77552	-4.01215
2.77715	-4.11164
2.79163	-4.0138
2.79622	-3.13071
2.80131	-4.05604
2.81039	-4.1037
2.8117	-4.09505
2.81611	-4.08143
2.8179	-3.51308
2.81865	-4.06005
2.82839	-4.08509
2.83442	-3.27965
2.83564	-3.1823
2.83857	-4.18347
2.8396	-4.06281
2.84117	-4.28066
2.84369	-4.06578
2.8443	-3.43646
2.84431	-4.06668
2.86419	-4.05047
2.86521	-4.30509
2.88091	-4.10343
2.88337	-4.22756
2.88698	-3.23288
2.89793	-4.13122
2.89928	-4.14769
2.90648	-4.17084
2.91065	-4.19301
2.9196	-4.17322
2.9239	-4.36588
2.93444	-4.32775
2.94177	-2.98788
2.9455	-2.86582
2.95566	-4.21471
2.96382	-4.41724
2.96687	-2.97486
2.97888	-4.25189
2.98319	-3.0594
2.99345	-2.82909
2.99531	-4.26741
2.99943	-3.4565
3.00353	-3.76336
3.00467	-4.24818
3.00551	-4.36004
3.00825	-3.52124
3.0097	-4.28916
3.01886	-3.70331
3.01941	-3.68426
3.02371	-4.28645
3.02693	-3.46444
3.02817	-3.84902
3.03033	-4.33278
3.03201	-3.2884
3.03656	-2.93802
3.03757	-4.22618
3.03979	-3.62955
3.04226	-4.37695
3.0424	-4.35946
3.05551	-4.5882
3.06519	-3.20554
3.06649	-3.08146
3.06972	-4.31573
3.07137	-2.82894
3.0733	-4.42982
3.07692	-4.34226
3.08641	-4.45905
3.09017	-4.55731
3.09271	-2.85648
3.09288	-3.0286
3.09423	-4.46671
3.09645	-3.65397
3.09656	-2.89486
3.09691	-2.78488
3.10003	-4.44418
3.10313	-3.18293
3.10422	-3.05934
3.11072	-2.81111
3.11286	-4.03383
3.11418	-4.51666
3.11502	-3.47124
3.11592	-4.41753
3.11756	-3.11844
3.12747	-4.45167
3.1332	-2.8524
3.13388	-4.46207
3.13397	-3.02466
3.13651	-3.65105
3.13747	-2.8929
3.13778	-2.78355
3.13972	-4.44339
3.14525	-2.83044
3.14988	-4.03749
3.15203	-3.47617
3.15298	-4.52287
3.15566	-3.12595
3.16295	-3.21473
3.17441	-2.84506
3.19283	-3.2978
3.20155	-3.3172
3.21146	-2.73353
3.20793	-2.72744
3.20465	-2.68077
3.19991	-2.47519
3.19844	-2.39508
3.19731	-2.662
3.18999	-2.45554
3.18965	-2.67491
3.18739	-2.37536
3.18207	-2.40709
3.17113	-2.58987
3.15846	-2.36776
3.15827	-2.39038
3.15419	-2.28302
3.13227	-2.73547
3.12884	-2.1598
3.1061	-2.25418
3.09448	-2.71059
3.09121	-2.74037
3.08975	-2.69107
3.08745	-2.16592
3.08379	-2.67766
3.07229	-2.2442
3.05541	-2.73523
3.05413	-2.72067
3.04419	-2.28576
3.00588	-2.38607
3.00222	-2.30906
3.00014	-2.69817
2.99962	-2.58734
2.99314	-2.54947
2.99286	-2.65658
2.98942	-2.53882
2.98659	-1.96656
2.98264	-2.46808
2.95824	-2.68421
2.95488	-2.61642
2.9309	-2.5975
2.92318	-2.49946
2.92107	-2.50928
2.91102	-2.52956
2.90642	-2.06406
2.84539	-2.43875
2.82365	-2.44321
2.811	-2.13361
2.78718	-2.29333
2.75386	-2.4816
2.7389	-2.43249
2.73254	-2.11514
2.72613	-2.28446
2.70958	-1.95403
2.67022	-2.28574
2.63726	-1.71733
2.63559	-2.30495
2.63274	-1.85329
2.63115	-2.31374
2.6183	-1.77975
2.61346	-2.37348
2.61018	-2.62775
2.60974	-2.75274
2.60655	-1.84362
2.60261	-2.25316
2.59453	-2.28336
2.59316	-2.35814
2.58906	-2.3883
2.58714	-2.52412
2.56633	-2.56568
2.56207	-2.2399
2.5495	-1.97808
2.51524	-1.98381
2.5047	-2.57887
2.45663	-1.62511
2.41572	-1.49038
2.37988	-1.91692
2.37324	-1.95562
2.37189	-1.94372
2.36182	-1.95363
2.34752	-1.31682
2.34652	-1.99692
2.34616	-2.00638
2.34088	-2.69277
2.33261	-2.00907
2.33181	-2.34194
2.30043	-2.12326
2.28738	-2.15853
2.28305	-2.2046
2.2797	-1.76212
2.2619	-2.30987
2.2339	-1.2348
2.23307	-2.46149
2.23144	-1.30577
2.23061	-2.69664
2.22448	-1.83589
2.22121	-2.83165
2.22044	-1.56848
2.21825	-2.65962
2.20996	-1.4667
2.1604	-1.46972
2.14501	-1.68249
2.12517	-1.80806
2.10295	-2.82045
2.10168	-2.01058
2.07061	-2.86514
1.19914		-0.961206
1.3294		-1.05997
1.45994		-1.0316
1.50325		-1.44851
1.51922		-1.11152
1.54405		-1.1274
1.58086		-1.12829
1.58319		-1.14974
1.65549		-1.29233
1.68876		-1.48428
1.69819		-1.31728
1.72847		-1.18027
1.74674		-1.28
1.75993		-1.3734
1.76444		-1.69653
1.77306		-1.20835
1.77752		-1.15556
1.77776		-1.23006
1.79385		-1.12476
1.80722		-1.54677
1.81109		-1.68514
1.81323		-1.36833
1.8139		-1.31644
1.81764		-1.15746
1.8178		-1.39034
1.81951		-1.16503
1.8223		-1.34645
1.82388		-1.09935
1.82638		-1.26814
1.83495		-1.13862
1.9247		-1.10056
1.93224		-1.32065
1.93673		-1.17516
1.93675		-1.55506
1.9381		-1.32555
1.93954		-1.37565
1.94218		-1.39388
1.94553		-1.27987
1.94575		-1.44495
1.94822		-1.2836
1.94832		-1.27575
1.94922		-1.1638
1.9511		-1.11175
1.9512		-1.21302
1.95148		-1.15428
1.95221		-1.46771
1.95378		-1.11597
1.95987		-1.48119
1.96099		-1.1892
1.96198		-1.10394
1.96208		-1.2395
1.96486		-1.42311
1.9669		-1.29441
1.96769		-1.26326
1.96791		-1.41661
1.9682		-1.4618
1.96826		-1.30096
1.96893		-1.42162
1.96896		-1.0913
1.96941		-1.17036
1.97056		-1.22851
1.97169		-1.4844
1.97549		-1.24482
1.97653		-1.25755
1.97832		-1.1908
1.97861		-1.44228
1.97946		-1.09855
1.98089		-1.2121
1.98131		-1.44144
1.98136		-1.34448
1.98233		-1.15372
1.98393		-1.16849
1.98412		-1.55183
1.98551		-1.26485
1.98777		-1.21074
1.9886		-1.32254
1.98921		-1.47678
1.99097		-1.12327
1.99116		-1.18754
1.99146		-1.57113
1.99276		-1.13173
1.99442		-1.33899
1.99487		-1.49261
1.99489		-1.26606
1.9955		-1.11135
1.99563		-1.14476
1.99591		-1.13746
1.99604		-1.14698
1.99682		-1.25896
1.99701		-1.14481
1.99716		-1.39745
1.99735		-1.19944
1.99735		-1.39247
1.9988		-1.11886
1.9992		-1.15034
2.00012		-1.26061
2.00045		-1.19973
2.00055		-1.39186
2.00447		-1.38632
2.00477		-1.32765
2.00528		-1.21123
2.0059		-1.13201
2.00597		-1.47069
2.00667		-1.2769
2.00691		-1.15482
2.00713		-1.15555
2.00784		-1.40474
2.00933		-1.52479
2.01061		-1.20455
2.01125		-1.4162
2.01251		-1.09183
2.00871		-1.07889
2.0077		-1.06958
2.00749		-1.02435
2.00491		-0.768264
2.00441		-0.970304
2.00423		-0.493155
2.00304		-0.795196
2.00283		-0.635532
2.00258		-0.508548
2.0024		-0.992812
2.00213		-0.957252
2.00074		-0.644683
2.00031		-1.05139
1.99959		-0.964971
1.99938		-1.07292
1.99738		-1.06302
1.99718		-1.04997
1.99458		-1.03244
1.99449		-0.478186
1.99357		-1.07937
1.99324		-0.75215
1.99182		-1.00403
1.99144		-0.947824
1.99078		-0.967374
1.99066		-0.611811
1.9903		-0.908992
1.98912		-1.01631
1.98831		-1.02913
1.98756		-1.06213
1.98672		-0.923693
1.9851		-0.985695
1.98369		-0.94875
1.9829		-0.890425
1.98244		-1.00673
1.98127		-0.404442
1.97999		-1.00986
1.97979		-1.06499
1.9754		-1.08094
1.97236		-1.07139
1.97059		-0.964232
1.96803		-1.00639
1.96555		-0.928364
1.96413		-0.890518
1.96387		-0.832904
1.95837		-0.943644
1.95318		-0.337698
1.95175		-1.07627
1.82743		-0.971369
1.82519		-1.04462
1.80939		-1.05023
1.80776		-0.453573
1.7999		-0.971926
1.78938		-0.502164
1.78915		-0.310819
1.75726		-0.513138
1.7539		-0.50866
1.74674		-0.501204
1.74263		-0.534466
1.73817		-0.525347
1.73438		-0.385881
1.7257		-0.515097
1.71636		-0.533093
1.71553		-0.526407
1.70518		-0.527534
1.70168		-0.549692
1.69674		-0.534028
1.68407		-0.541826
1.67703		-0.545617
1.67534		-0.456829
1.65283		-0.99522
1.61367		-0.56063
1.59485		-0.56144
1.59323		-0.595645
1.58635		-0.565992
1.57672		-0.554319
1.57376		-0.553798
1.57283		-0.644967
1.57186		-0.550484
1.56934		-0.605069
1.56431		-0.624224
1.55949		-0.664522
1.55683		-0.612577
1.55582		-0.561974
1.55431		-0.578476
1.5539		-0.572544
1.55251		-0.809003
1.5483		-0.814958
1.54622		-0.952629
1.54478		-0.949456
1.54471		-0.676056
1.54434		-0.568446
1.54304		-0.563127
1.54011		-0.703054
1.53866		-0.577456
1.53449		-0.697348
1.53421		-0.850044
1.53086		-0.609396
1.52916		-0.614128
1.52011		-0.577904
1.51914		-0.882012
1.51697		-0.596066
1.51178		-0.584427
1.51018		-0.584036
1.50954		-0.781487
1.50597		-0.698461
1.50584		-0.727118
1.50489		-0.662042
1.50391		-0.594403
1.49877		-0.899968
1.49264		-0.701468
1.49187		-0.747262
1.49183		-0.601407
1.48955		-0.598526
1.48558		-0.604589
1.48333		-0.60195
1.48299		-0.64882
1.48251		-0.813681
1.48222		-0.578988
1.47615		-0.610076
1.47038		-0.757888
1.46173		-0.927123
1.45956		-0.774595
1.45694		-0.624476
1.45003		-0.625749
1.44112		-0.778962
1.44049		-0.638033
1.4358		-0.850655
1.42555		-0.855034
1.41122		-0.923591
1.40379		-0.654178
1.388		-0.892204
1.38492		-0.988878
1.36843		-0.883697
1.35909		-0.754342
1.29956		-0.652748
1.29384		-0.661949
1.28891		-0.690384
1.2806		-0.68714
1.27966		-0.682991
1.2765		-0.694781
1.27623		-0.68736
1.27056		-0.679732
1.23756		-0.794109
1.23655		-0.783443
1.19914		-0.961206
1.53929
1.55446
1.55605
1.57615
1.58032
1.7032
1.82155
1.86558
1.87429
1.8863
1.88897
1.93585
2.02269
2.07935
2.12141
2.14037
2.17774
2.34537
2.55678
2.59891
2.55621
2.5503
2.51602
2.51584
2.51197
2.49993
2.49965
2.49106
2.46871
2.46453
2.45529
2.45523
2.45437
2.4272
2.41721
2.41453
2.40826
2.39867
2.39866
2.39803
2.39531
2.385
2.38495
2.38045
2.37968
2.37226
2.36588
2.36455
2.35364
2.35243
2.34936
2.34854
2.34514
2.34402
2.33998
2.33695
2.3289
2.31948
2.31792
2.31764
2.31667
2.3162
2.31585
2.31512
2.30989
2.30556
2.30508
2.29965
2.29679
2.29336
2.292
2.28426
2.284
2.28281
2.27383
2.27219
2.26792
2.26783
2.26727
2.26043
2.26035
2.24963
2.22769
2.22164
2.19893
2.19756
2.19661
2.19645
2.19589
2.19404
2.19041
2.18523
2.18249
2.18199
2.17938
2.17925
2.17619
2.16932
2.16887
2.1643
2.16068
2.16061
2.1592
2.15835
2.15757
2.15706
2.15692
2.15164
2.1506
2.15042
2.14071
2.13679
2.13253
2.13207
2.13182
2.12976
2.12754
2.12549
2.12453
2.12426
2.12377
2.12242
2.12209
2.12061
2.11888
2.11602
2.1147
2.1141
2.11088
2.10439
2.10023
2.0945
2.09446
2.09152
2.08924
2.08784
2.08451
2.08079
2.07453
2.06568
2.06336
2.06073
2.05964
2.05835
2.05795
2.05648
2.05506
2.05472
2.05246
2.05238
2.05149
2.04698
2.04386
2.04261
2.04035
2.03815
2.03747
2.03736
2.0357
2.03532
2.03199
2.03002
2.02907
2.02632
2.02498
2.02265
2.02082
2.01988
2.0196
2.01395
2.00769
2.00758
2.00356
2.00272
1.99609
1.99566
1.98961
1.9881
1.98796
1.98651
1.98174
1.98104
1.97356
1.97107
1.97013
1.96649
1.96619
1.96149
1.95807
1.95159
1.95084
1.94728
1.942
1.9287
1.92373
1.92211
1.92024
1.90889
1.90808
1.9065
1.90535
1.904
1.89923
1.89888
1.89373
1.89348
1.88879
1.88777
1.887
1.88692
1.88354
1.88003
1.87785
1.87704
1.86567
1.85528
1.85026
1.84735
1.84361
1.84325
1.84248
1.83753
1.83705
1.83674
1.8336
1.83269
1.82857
1.82817
1.82175
1.819
1.8173
1.81724
1.81719
1.80651
1.79946
1.7992
1.78574
1.77763
1.76983
1.76464
1.76374
1.75901
1.75834
1.75343
1.75057
1.72787
1.72723
1.71827
1.71267
1.67275
1.64286
1.63241
1.62944
1.60647
1.57619
1.53929
2.82954
2.83001
2.83212
2.83389
2.83689
2.84718
2.84739
2.8541
2.85431
2.86053
2.86091
2.86116
2.86168
2.8653
2.86703
2.87163
2.87283
2.87402
2.87435
2.87454
2.87767
2.87791
2.87822
2.88356
2.88481
2.88561
2.89123
2.89159
2.89721
2.89993
2.90351
2.90398
2.90739
2.91483
2.92327
2.92405
2.92414
2.92499
2.92817
2.92921
2.93144
2.93609
2.93717
2.94088
2.94155
2.94549
2.94945
2.94945
2.95057
2.95288
2.95571
2.95577
2.95784
2.9609
2.96117
2.96556
2.96664
2.96761
2.97236
2.97344
2.97603
2.97734
2.97753
2.97835
2.98107
2.98249
2.98254
2.98393
2.98522
2.98664
2.98878
2.99214
2.99259
3.00048
3.00266
3.00586
3.00613
3.00718
3.00759
3.0086
3.00886
3.00934
3.01102
3.01151
3.0128
3.0132
3.01492
3.0202
3.02536
3.02736
3.02823
3.02915
3.0302
3.03175
3.03261
3.03302
3.03277
3.03099
3.02977
3.02943
3.02768
3.02738
3.02558
3.02447
3.02263
3.01841
3.01754
3.01647
3.01599
3.01295
3.01202
3.01139
3.01108
3.01063
3.01048
3.00994
3.00948
3.00865
3.0086
3.00854
3.00849
3.00802
3.00776
3.00763
3.00732
3.00696
3.00672
3.00632
3.00331
3.00261
3.00217
3.00119
3.00022
2.99988
2.99929
2.9977
2.99488
2.99446
2.99346
2.98819
2.98568
2.98467
2.98281
2.98224
2.97821
2.97797
2.9772
2.97371
2.97248
2.97219
2.97191
2.97128
2.96974
2.96907
2.96899
2.96816
2.96702
2.96699
2.96677
2.96505
2.9648
2.9647
2.96407
2.96385
2.96319
2.96242
2.96239
2.96202
2.9611
2.96047
2.95968
2.95879
2.95852
2.95836
2.95818
2.95753
2.95672
2.95514
2.95263
2.95185
2.95168
2.9505
2.94959
2.94945
2.94789
2.94737
2.94726
2.94592
2.94541
2.94373
2.94359
2.94106
2.93979
2.93967
2.93865
2.9376
2.93729
2.93713
2.93636
2.93463
2.93373
2.93315
2.93214
2.93192
2.93094
2.93092
2.93088
2.93079
2.93061
2.92967
2.92854
2.92785
2.92711
2.92561
2.92446
2.92416
2.92386
2.92301
2.92223
2.92092
2.91727
2.91613
2.91485
2.91201
2.89894
2.89385
2.89313
2.88935
2.88749
2.88657
2.88594
2.88361
2.8834
2.88204
2.87958
2.87806
2.8771
2.87678
2.87677
2.87598
2.85493
2.85493
2.85493
2.85493
2.85493
2.84754
2.84609
2.8451
2.84453
2.84372
2.84344
2.8433
2.84238
2.84142
2.84119
2.82954
1.34272
1.388
1.41058
1.42983
1.48644
1.74492
1.7575
1.77084
1.80204
1.88238
1.92784
1.95042
2.0291
2.10879
2.12361
2.12635
2.17661
2.18605
2.23565
2.24006
2.24617
2.251
2.2525
2.25887
2.26325
2.27208
2.27494
2.27568
2.27643
2.28042
2.28695
2.28698
2.28862
2.2913
2.29967
2.3083
2.31045
2.31259
2.31474
2.31556
2.32137
2.3218
2.32443
2.32756
2.33365
2.33482
2.33531
2.33599
2.35175
2.3536
2.35665
2.45896
2.46898
2.4732
2.47493
2.47539
2.4773
2.47804
2.48114
2.48377
2.48378
2.48819
2.48852
2.4887
2.48877
2.49465
2.49675
2.49714
2.49743
2.49836
2.50356
2.50416
2.50708
2.50857
2.51076
2.51123
2.51666
2.51666
2.51845
2.51874
2.52184
2.52195
2.52251
2.52882
2.53043
2.53135
2.53161
2.53193
2.53246
2.53344
2.53354
2.53373
2.53376
2.53416
2.53576
2.53648
2.5365
2.53777
2.53845
2.53982
2.54072
2.54074
2.5416
2.54254
2.54277
2.54536
2.54585
2.54595
2.54854
2.54972
2.54986
2.55038
2.55055
2.55092
2.55109
2.55222
2.55245
2.55262
2.55341
2.5535
2.55388
2.55428
2.5544
2.55491
2.555
2.55524
2.55554
2.55731
2.5576
2.55955
2.55994
2.56084
2.56167
2.56202
2.56254
2.56313
2.56373
2.56489
2.56539
2.56714
2.56398
2.5628
2.56227
2.56134
2.56033
2.5596
2.55849
2.55753
2.55558
2.55138
2.54992
2.54765
2.54684
2.52638
2.50049
2.49302
2.48942
2.34046
2.33698
2.33474
2.3292
2.32685
2.28427
2.27686
2.26467
2.26164
2.02713
2.02523
2.00553
1.99021
1.98295
1.96473
1.94862
1.93776
1.93739
1.9343
1.89324
1.89261
1.89135
1.87117
1.86208
1.86206
1.84811
1.84151
1.82774
1.8206
1.81418
1.81383
1.8132
1.80751
1.8032
1.79923
1.79041
1.78801
1.77271
1.77227
1.76546
1.76102
1.76003
1.75914
1.75725
1.757
1.75496
1.74773
1.73606
1.73426
1.73334
1.7328
1.71909
1.71855
1.70798
1.70518
1.70242
1.70041
1.6895
1.68889
1.68651
1.68463
1.68457
1.66959
1.66755
1.6625
1.65381
1.65113
1.64838
1.64038
1.62081
1.61606
1.61269
1.61118
1.60309
1.59324
1.58724
1.58397
1.57985
1.57716
1.57206
1.56869
1.56753
1.56669
1.56539
1.53607
1.5239
1.51816
1.51631
1.50627
1.50379
1.48928
1.43853
1.42314
1.42282
1.4224
1.41472
1.40554
1.37408
1.34272
3.39705
3.53769
3.55457
3.55637
3.56844
3.57805
3.58285
3.59869
3.61429
3.61607
3.61812
3.63054
3.65665
3.71318
3.73554
3.90191
3.92404
3.94932
3.96552
3.97007
3.97372
3.97441
3.97561
3.98562
3.98712
3.98728
3.98981
3.99577
3.99904
4.00447
4.00565
4.00699
4.01034
4.01327
4.01358
4.01764
4.01778
4.02287
4.02298
4.02308
4.02458
4.02503
4.02708
4.03043
4.03064
4.03092
4.03134
4.03219
4.03288
4.03467
4.03478
4.0349
4.03615
4.03741
4.03798
4.03937
4.04163
4.04204
4.04289
4.0436
4.04392
4.04452
4.04633
4.04695
4.04819
4.05106
4.0515
4.05203
4.05355
4.05402
4.05628
4.05672
4.05726
4.05801
4.05887
4.05899
4.05943
4.05964
4.06052
4.06421
4.06438
4.06441
4.06491
4.06494
4.06513
4.06644
4.06679
4.06637
4.06632
4.06627
4.06558
4.06504
4.06498
4.06486
4.06418
4.0637
4.06326
4.06295
4.06293
4.06257
4.06252
4.06242
4.06214
4.06171
4.06118
4.0607
4.0604
4.06034
4.05926
4.05856
4.05703
4.05674
4.05522
4.05496
4.05463
4.05459
4.05457
4.05368
4.05312
4.05139
4.05088
4.05084
4.05069
4.0504
4.05022
4.04844
4.04831
4.04817
4.04813
4.04547
4.04498
4.04486
4.0447
4.04434
4.04364
4.04357
4.04261
4.04113
4.04049
4.03978
4.03884
4.0368
4.03588
4.03546
4.03542
4.03477
4.03171
4.03095
4.03001
4.02971
4.02965
4.02665
4.02535
4.02455
4.02296
4.02143
4.01996
4.01829
4.01592
4.01548
4.0138
4.01248
4.00408
4.00342
3.98411
3.97837
3.93393
3.86732
3.82674
3.82193
3.8186
3.81
3.79765
3.76938
3.75405
3.75162
3.73303
3.72444
3.70049
3.70041
3.69736
3.68473
3.67704
3.67219
3.65219
3.64959
3.64426
3.63757
3.63435
3.6222
3.61848
3.61472
3.61396
3.61356
3.60927
3.60642
3.60402
3.59915
3.59829
3.59491
3.59182
3.59124
3.59036
3.58943
3.58898
3.58879
3.58351
3.58228
3.57805
3.57707
3.57658
3.573
3.57018
3.56937
3.56587
3.56397
3.55804
3.55544
3.55481
3.55019
3.54652
3.54122
3.53875
3.53465
3.53048
3.52946
3.52877
3.52665
3.52546
3.52509
3.52261
3.51964
3.51564
3.51337
3.51333
3.51121
3.50347
3.4979
3.49458
3.49429
3.49294
3.48658
3.47648
3.47419
3.47211
3.46617
3.45487
3.44643
3.43801
3.42839
3.42706
3.42394
3.42239
3.4215
3.42119
3.39705
1.13182
1.13182
1.13182
1.13182
1.13182
1.15062
1.15322
1.15466
1.16227
1.16301
1.16874
1.17114
1.21769
1.23854
1.24718
1.2535
1.25674
1.25902
1.26073
1.26396
1.27371
1.27724
1.2854
1.28664
1.29236
1.29735
1.30472
1.31158
1.31801
1.32239
1.32481
1.32849
1.3286
1.33098
1.33327
1.33418
1.33472
1.33561
1.34495
1.34977
1.35479
1.35711
1.35719
1.35762
1.36363
1.36524
1.36572
1.3702
1.37266
1.38625
1.38778
1.39158
1.39195
1.39804
1.40262
1.41839
1.42638
1.43987
1.45695
1.46281
1.46885
1.47767
1.4781
1.47913
1.48099
1.48205
1.48314
1.49537
1.49964
1.5005
1.50107
1.50234
1.5131
1.51564
1.51628
1.51807
1.52015
1.52052
1.52103
1.52688
1.52767
1.52798
1.5415
1.54938
1.56046
1.56685
1.58163
1.58555
1.5873
1.59075
1.59595
1.6009
1.60963
1.6119
1.62073
1.6247
1.62545
1.6314
1.64512
1.65069
1.65071
1.6511
1.65255
1.66585
1.66663
1.66715
1.66802
1.66942
1.6721
1.6762
1.67722
1.67916
1.67928
1.68136
1.68547
1.68673
1.69006
1.71714
1.73907
1.75044
1.76237
1.76599
1.77211
1.77999
1.78193
1.80217
1.85318
1.89438
1.81467
1.81269
1.79709
1.79118
1.79061
1.78246
1.76661
1.76607
1.75398
1.74404
1.74241
1.74069
1.73699
1.73411
1.73294
1.73167
1.73023
1.72913
1.72892
1.72758
1.71599
1.71514
1.71315
1.71296
1.71221
1.71216
1.71177
1.70763
1.70728
1.70567
1.69544
1.69255
1.69179
1.69152
1.68727
1.6868
1.68669
1.68504
1.68439
1.68426
1.68144
1.67785
1.67703
1.6644
1.66173
1.66074
1.6591
1.65693
1.65604
1.65565
1.65425
1.65102
1.64273
1.63922
1.63863
1.63856
1.63562
1.63206
1.6269
1.62439
1.61483
1.60778
1.60499
1.59272
1.58645
1.58507
1.57477
1.57447
1.57291
1.55245
1.54965
1.52755
1.51624
1.51543
1.51455
1.51184
1.51002
1.50561
1.50498
1.50399
1.50018
1.49913
1.47434
1.47382
1.47039
1.45224
1.45024
1.44181
1.44169
1.43399
1.43291
1.42611
1.42535
1.42286
1.41746
1.41447
1.39191
1.39099
1.39029
1.38731
1.38443
1.38349
1.37398
1.37176
1.3628
1.3624
1.36236
1.36236
1.36236
1.36236
1.36236
1.35747
1.35421
1.35394
1.34943
1.34838
1.34367
1.33678
1.33386
1.33054
1.3231
1.30507
1.30042
1.2957
1.2957
1.29259
1.28055
1.13182
3.67429			-1.00391
3.67429			-1.00391
3.67429			-1.00391
3.67429			-1.00391
3.67429			-1.00391
3.73111			-1.02756
3.73239			-1.14722
3.75478			-1.17795
3.75704			-1.14548
3.77338			-1.05562
3.78187			-1.11691
3.78621			-1.45527
3.78636			-1.32956
3.78735			-1.06043
3.78743			-1.06437
3.78968			-1.07147
3.79821			-1.35932
3.81177			-1.36957
3.8126			-1.10329
3.81338			-1.16257
3.81622			-1.09855
3.8231			-1.10164
3.82404			-1.03822
3.83114			-1.09875
3.83263			-1.26378
3.83907			-1.01333
3.84037			-1.07109
3.84181			-1.12148
3.84237			-1.17409
3.84615			-1.01502
3.84873			-1.4084
3.85588			-1.16642
3.8566			-0.97999
3.85714			-1.05701
3.86653			-1.43251
3.86718			-0.97922
3.86894			-1.00504
3.87504			-1.38354
3.8768			-1.08372
3.87737			-1.01519
3.88123			-1.16882
3.88257			-1.25377
3.88344			-1.07741
3.88409			-1.06972
3.88463			-1.20351
3.88768			-1.25907
3.88801			-1.03988
3.89044			-1.01623
3.8914			-1.01885
3.89203			-1.08461
3.89397			-0.998639
3.89462			-1.03764
3.89715			-1.08664
3.89742			-1.07655
3.90429			-1.14595
3.90895			-1.0256
3.91019			-1.19941
3.91102			-1.03289
3.91119			-0.98591
3.91285			-1.1845
3.91385			-1.1622
3.91619			-1.04653
3.91662			-1.08012
3.91846			-1.10058
3.91921			-1.05748
3.91984			-1.0422
3.91988			-1.11469
3.92032			-1.04708
3.92084			-1.26783
3.92108			-1.10274
3.92129			-1.15779
3.92339			-1.08509
3.92372			-1.14143
3.92432			-1.298
3.92499			-0.971579
3.92551			-0.977386
3.9259			-1.14596
3.92696			-1.22155
3.92718			-1.15592
3.92733			-1.03857
3.92994			-1.15697
3.93177			-1.23103
3.9318			-1.14643
3.9325			-1.28364
3.93259			-1.07403
3.93356			-1.04642
3.93451			-1.21799
3.93592			-1.06526
3.93993			-1.20673
3.9401			-1.09004
3.9428			-1.60356
3.9434			-1.00284
3.94371			-1.15919
3.94407			-1.14214
3.94773			-1.0396
3.95626			-1.10548
3.95775			-1.34969
3.96188			-1.35658
3.96249			-0.980095
3.96365			-1.23103
3.96474			-1.14508
3.96513			-1.317
3.96583			-1.28244
3.96867			-0.998771
3.97139			-1.36688
3.97639			-1.52372
3.97717			-1.36984
3.9794			-0.977394
3.97941			-1.09503
3.98441			-1.04871
3.99194			-1.16631
3.99207			-1.18471
3.99557			-1.25169
3.99614			-1.219
3.99639			-1.06069
3.99663			-1.28773
3.99668			-1.15716
3.99939			-1.09224
3.99984			-1.29122
4.00299			-1.30608
4.01383			-1.08808
4.0159			-1.32143
4.01709			-1.02351
4.01824			-1.14178
4.02292			-1.25982
4.02482			-1.12775
4.02637			-1.26541
4.03244			-0.955287
4.03623			-1.24816
4.03777			-0.953996
4.02704			-0.829028
4.0015			-0.820312
3.99405			-0.584581
3.99405			-0.584581
3.99405			-0.584581
3.99405			-0.584581
3.99405			-0.584581
3.99212			-0.819502
3.98585			-0.857842
3.98445			-0.574205
3.98178			-0.897394
3.97729			-0.874124
3.97365			-0.889264
3.97319			-0.750064
3.97285			-0.851687
3.96236			-0.92074
3.9559			-0.933105
3.95217			-0.755566
3.94693			-0.857537
3.94185			-0.63581
3.93997			-0.898763
3.93208			-0.807448
3.92531			-0.700921
3.92409			-0.708026
3.92312			-0.915703
3.92092			-0.820311
3.92062			-0.789495
3.9197			-0.680055
3.91939			-0.681737
3.91671			-0.676216
3.91587			-0.65928
3.91473			-0.689297
3.9142			-0.670923
3.91392			-0.675545
3.91118			-0.792508
3.91057			-0.945746
3.91004			-0.797566
3.90928			-0.771597
3.90879			-0.695348
3.90586			-0.672433
3.90496			-0.875442
3.90102			-0.807986
3.90065			-0.777123
3.8996			-0.662065
3.89827			-0.902881
3.89801			-0.786775
3.89761			-0.762205
3.89261			-0.772629
3.88815			-0.860748
3.88625			-0.750797
3.88305			-0.748636
3.88171			-0.80741
3.8806			-0.6928
3.87958			-0.807834
3.87672			-0.788878
3.87391			-0.933516
3.8731			-0.685384
3.86978			-0.944338
3.86868			-0.69087
3.86845			-0.724717
3.86766			-0.921687
3.86652			-0.708417
3.8641			-0.715458
3.86375			-0.814454
3.86262			-0.775605
3.86228			-0.718519
3.86221			-0.964807
3.86173			-0.721146
3.85854			-0.705154
3.85646			-0.798281
3.8476			-0.74964
3.84717			-0.803954
3.84618			-0.930063
3.83599			-0.949252
3.83519			-0.782206
3.8269			-0.91799
3.82548			-0.768655
[truncated: 1,841 more rows]

## Sheet: Fig. 7, Fig 8a and Fig 8b
drug	efficacy (mg/L) (lowest value)	predicted_logp (chembl – acd)	centroid DQI total (human) Css_central_max	centroid DQI total (human) AUCss_central	log10(efficacy)
chlorpromazine	0.03	5.18	-2.9306	-1.14724	-1.52288
diazepam	0.1	2.8	-0.944867	1.41761	-1
diclofenac	0.5	4.55	-1.55806	-0.0426174	-0.30103
furosemide	2	2.3	-2.02997	0.208202	0.30103
haloperidol	0.001	3.76	-2.83482	-0.877096	-3
imipramine	0.05	4.36	-3.06072	-0.995925	-1.30103
indomethacin	0.3	4.25	-1.01553	0.630529	-0.522879
ketoprofen	1	2.91	-1.00283	0.671114	0
naproxen	20	2.88	-0.451408	2.20277	1.30103
nifedipine	0.025	3.58	-2.06976	-0.939998	-1.60206
phenytoin	5	1.42	-1.12997	1.1221	0.69897
pindolol	0.02	1.68	-1.94857	-0.402	-1.69897
prazosin	0.001	2.14	-2.29683	-0.215618	-3
trimethoprim	1.5	0.59	-1.39424	0.572056	0.176091
warfarin	1	3.13	-0.302615	2.41071	0
